# Supplementary material for: Rapid synthesis of layered KxMnO2 cathodes from metal–organic frameworks for potassium-ion batteries
Source: Royal Society of Chemistry journal article supplement (doi:10.1039/d2sc02442j), 2022-01-01
Supplement: d2sc02442j2.pdf [file d2sc02442j2.pdf]

# Supporting Information

## Rapid Synthesis of Layered $K_xMnO_2$ Cathodes from Metal-Organic Frameworks for Potassium-Ion Batteries

Ang Li,<sup>†</sup> Changfeng Li,<sup>†</sup> PeiXun Xiong,<sup>†</sup> Jinfeng Zhang,<sup>a</sup> Dongling Geng,<sup>b</sup> and Yunhua Xu\*<sup>a</sup>

<sup>a</sup> School of Materials Science and Engineering, Key Laboratory of Advanced Ceramics and Machining Technology (Ministry of Education), and Tianjin Key Laboratory of Composite and Functional Materials, Tianjin University, Tianjin 300072, China.

<sup>b</sup> School of Materials Science and Engineering, Nanjing University of Science and Technology, 200 Xiaolingwei, Nanjing 210094, P. R. ChinaAddress here.

<sup>†</sup> Ang Li, Changfeng Li and Peixun Xiong contributed equally to this work.

\* Author for correspondence

E-mail: yunhua.xu@tju.edu.cn

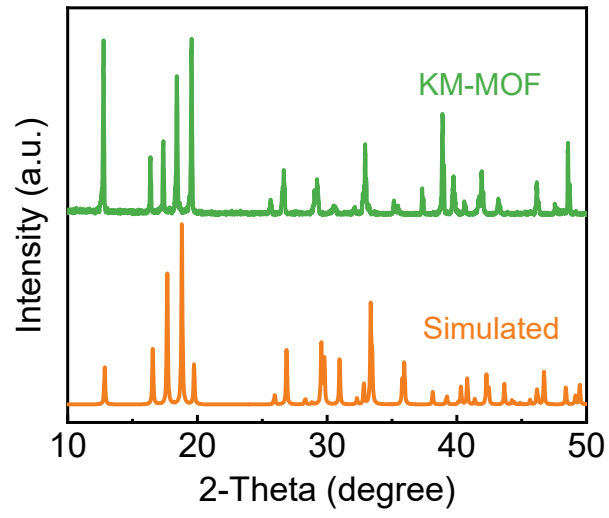

**Fig. S1** XRD pattern of KM-MOF.

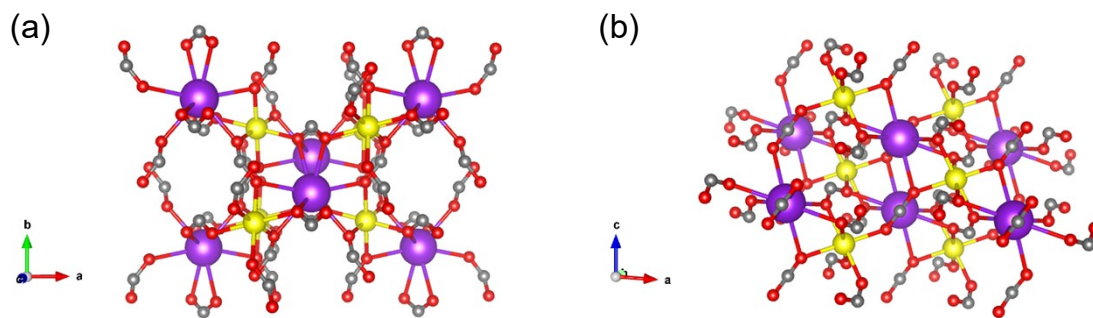

**Fig. S2** 3D structures of KM-MOF along (a) c and (b) b directions. (Mn: yellow, K: purple, C: gray, and O: red).

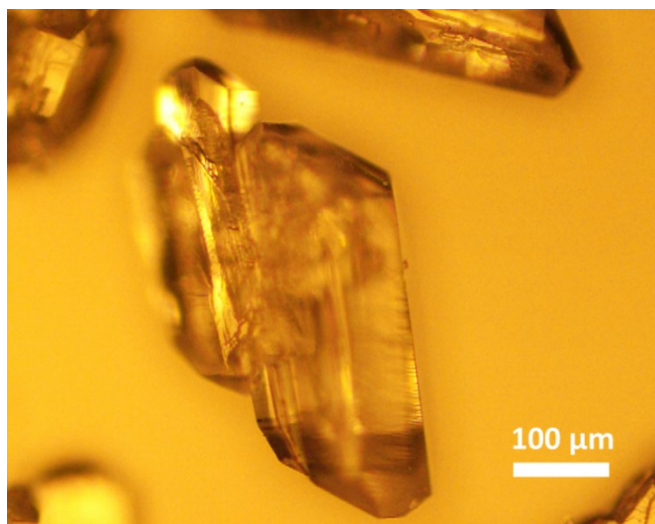

**Fig. S3** Optical microscope photograph image of KM-MOF.

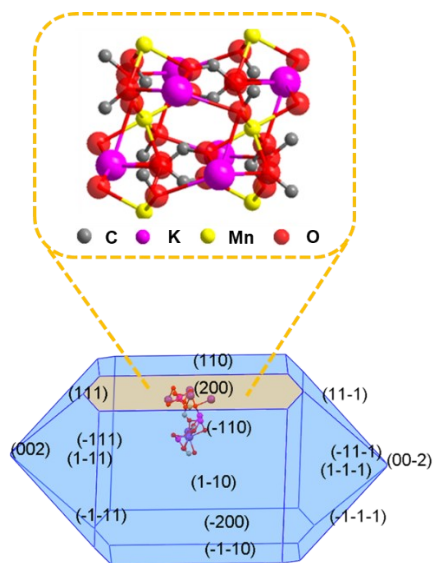

**Fig. S4** Crystal structure on the view of (200) plane of KM-MOF.

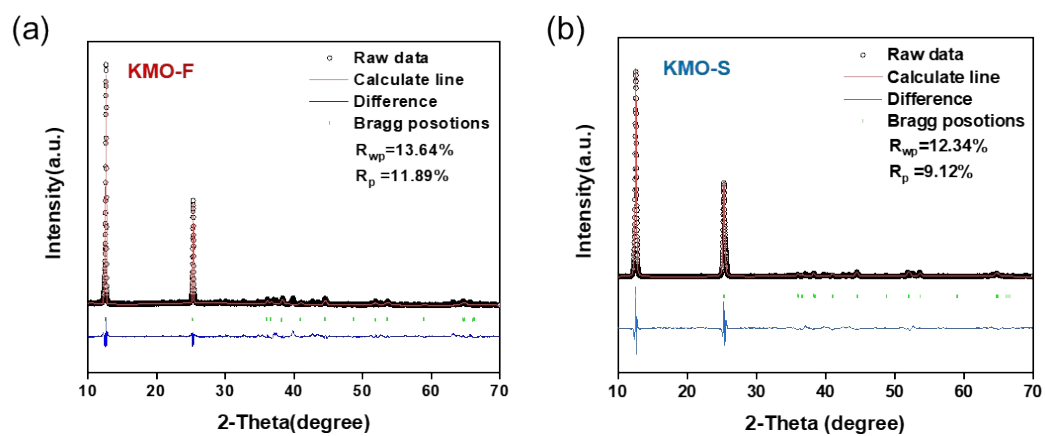

Fig. S5 XRD patterns and Rietveld refinement plots of (a) KMO-F and (b) KMO-S.

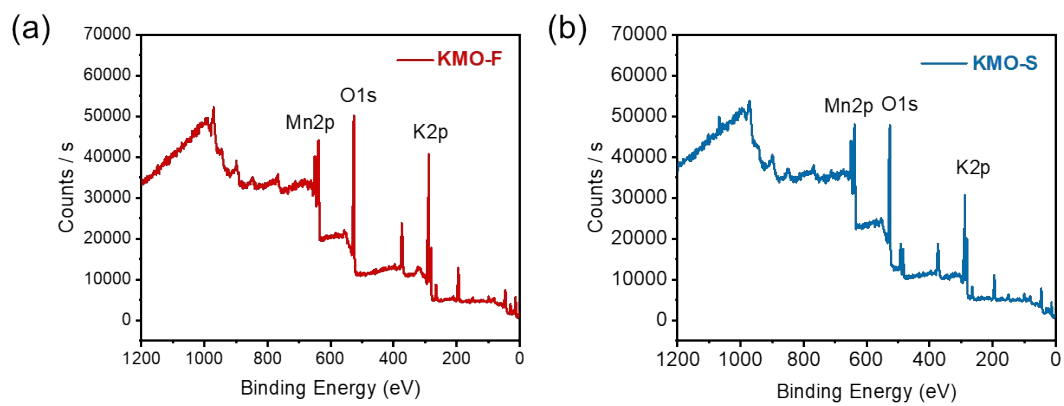

**Fig. S6** Full XPS survey scans of (a) KMO-F and (b) KMO-S.

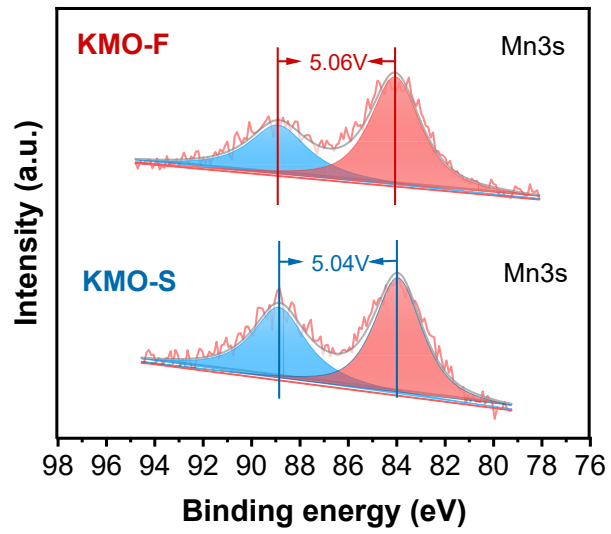

Fig. S7 XPS spectra of Mn 3s and compositional analyse for KMO-F and KMO-S.



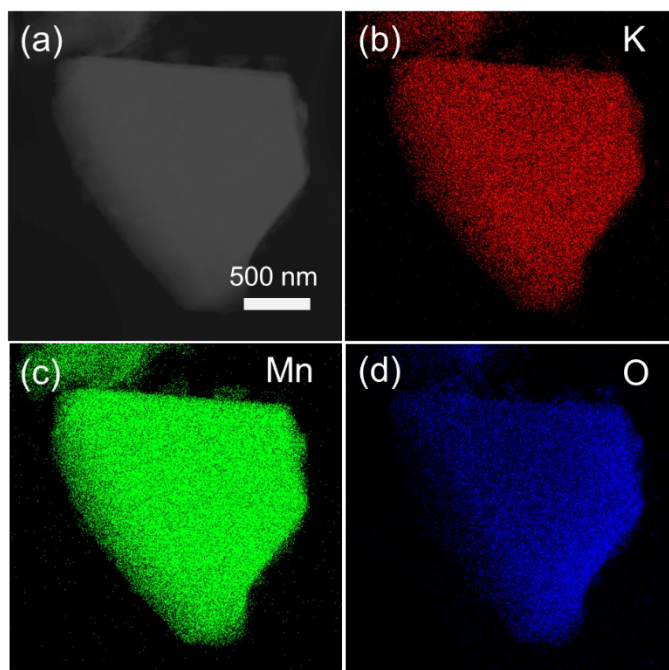

**Fig. S8** STEM image of KMO-S and elemental mappings of K, Mn, and O.

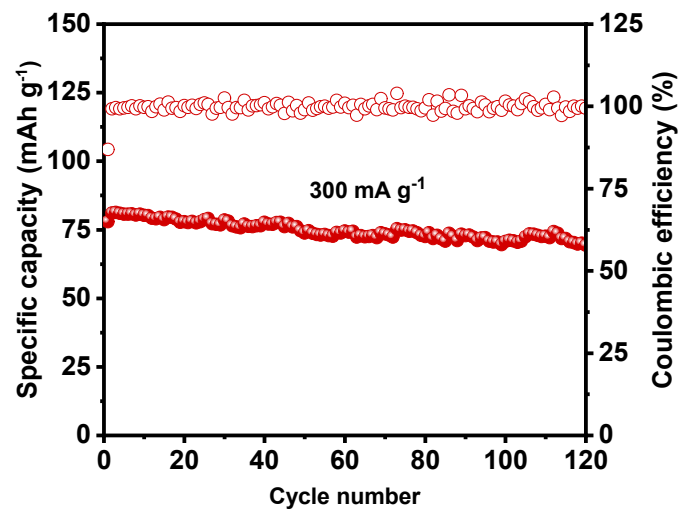

Fig. S9 Cycling performance of KMO-F at 300 mA g<sup>-1</sup> in the voltage range of 2.0-4.2V.

**Tab. S1** Comparison of reaction conditions for preparing layered  $K_xMnO_2$  in this work and the literature.

| Layered Oxides                       | Synthesis methods                    | Calcination temperature and time | References       |
|--------------------------------------|--------------------------------------|----------------------------------|------------------|
| <b>KMO-F</b>                         | <b>Thermal decomposition of MOFs</b> | <b>1000 °C@8 min</b>             | <b>This work</b> |
| P3-Type $K_{0.5}MnO_2$               | Solid state                          | 800 °C@12 h                      | 1                |
| $K_{0.45}Mn_{1-x}Fe_xO_2$            | Solid state                          | 850 °C@15 h                      | 2                |
| P2- $K_{0.44}Ni_{0.22}Mn_{0.78}O_2$  | Solid state                          | 1000 °C@30 h                     | 3                |
| P3- $K_{0.48}Mn_{0.4}Co_{0.6}O_2$    | Solid state                          | 850 °C@2 h                       | 4                |
| $K_{0.54}Mn_{0.78}Mg_{0.22}O_2$      | Solid state                          | 800 °C@10 h                      | 5                |
| $K_{0.6}Mn_{0.8}Ni_{0.1}Ti_{0.1}O_2$ | Solid state                          | 1000 °C@15 h                     | 6                |
| P2-KMO                               | Sol-gel method                       | 950 °C@24h                       | 7                |
| $K_xMnO_2$                           | Co-precipitation                     | 900 °C@15 h                      | 8                |
| P2- $K_{0.75}[Ni_{0.3}Mn_{0.7}]O_2$  | Co-precipitation                     | 900 °C@10 h                      | 9                |
| $K_xMn_{0.7}Ni_{0.3}O_2$             | Co-precipitation                     | 900 °C@10 h                      | 10               |

**Tab. S2** Comparison of electrochemical performances of LTMOs in KIBs in this work and the literature.

| Layered oxides                                                                            | Discharge capacity<br>(mAh g <sup>-1</sup> ) | Cycle performance<br>(capacity retention@cycles ) | Rate performance<br>(mAh g <sup>-1</sup> @mA g <sup>-1</sup> ) | References       |
|-------------------------------------------------------------------------------------------|----------------------------------------------|---------------------------------------------------|----------------------------------------------------------------|------------------|
| <b>KMO-F</b>                                                                              | <b>126.6</b>                                 | <b>80%@100</b>                                    | <b>64@1000</b>                                                 | <b>This work</b> |
| <b>KMO-S</b>                                                                              | <b>119.5</b>                                 | <b>85%@100</b>                                    | <b>72@1000</b>                                                 | <b>This work</b> |
| P3-K <sub>0.5</sub> MnO <sub>2</sub>                                                      | 100                                          | 70%@50                                            | 38@100                                                         | 1                |
| P3- K <sub>0.45</sub> MnO <sub>2</sub>                                                    | 129                                          | 70.8%@100                                         | 51@200                                                         | 8                |
| P2- K <sub>0.3</sub> MnO <sub>2</sub>                                                     | 117                                          | 61.1%@100                                         | 48@200                                                         | 8                |
| P2- K <sub>0.67</sub> MnO <sub>2</sub>                                                    | 78                                           | 90.5%@300                                         | 78@200                                                         | 7                |
| K <sub>0.77</sub> MnO <sub>2</sub> ·0.23H <sub>2</sub> O                                  | 125                                          | 93%@100                                           | 77@1000                                                        | 11               |
| P2-K <sub>0.44</sub> Ni <sub>0.22</sub> Mn <sub>0.78</sub> O <sub>2</sub>                 | 82                                           | 67%@500                                           | 58@500                                                         | 3                |
| P2-K <sub>0.75</sub> Mn <sub>0.8</sub> Ni <sub>0.1</sub> Fe <sub>0.1</sub> O <sub>2</sub> | 80                                           | 70%@200                                           | 62@1000                                                        | 12               |
| P3- K <sub>0.48</sub> Mn <sub>0.4</sub> Co <sub>0.6</sub> O <sub>2</sub>                  | 48                                           | 82%@30                                            | 24@119                                                         | 4                |
| P'3- K <sub>0.3</sub> Mn <sub>0.9</sub> Cu <sub>0.1</sub> O <sub>2</sub>                  | 124                                          | 82%@50                                            | 64@500                                                         | 13               |

**Tab. S3** Summary of bond lengths in KM-MOF.

| <b>Bonds</b> | <b>Bond Lengths (Å)</b>                             |
|--------------|-----------------------------------------------------|
| Mn-O         | 2.190(1) *2, 2.177(1) *2, 2.173(1), 2.109(1) *2     |
| K-O          | 2.834(1) *1, 2.859(1) *2, 2.834 (1) *2, 2.751(1) *1 |

**Tab. S4** ICP-AES test results of layered  $K_xMnO_2$ .

| <b>Products</b> | <b>x values</b> | <b>Atomic ratios of K : Mn</b> |
|-----------------|-----------------|--------------------------------|
| KMO-F           | 0.53            | 0.526 : 1                      |
| KMO-S           | 0.51            | 0.514 : 1                      |

**Tab. S5** Compositional analyses from Mn3s XPS spectra of KMO-F and KMO-S.

| <b>Products</b> | <b><math>\Delta E_{3s}</math> (eV)</b> | <b>Valences of Mn</b> |
|-----------------|----------------------------------------|-----------------------|
| KMO-F           | 5.06                                   | 3.47                  |
| KMO-S           | 5.04                                   | 3.49                  |

## References

1. H. Kim, D.-H. Seo, J. C. Kim, S.-H. Bo, L. Liu, T. Shi and G. Ceder, *Adv. Mater.*, 2017, **29**, 1702480.
2. C.-l. Liu, S.-h. Luo, H.-b. Huang, X. Liu, Y.-c. Zhai and Z.-w. Wang, *Chem. Eng. J.*, 2019, **378**, 122167.
3. X. Zhang, Y. Yang, X. Qu, Z. Wei, G. Sun, K. Zheng, H. Yu and F. Du, *Adv. Funct. Mater.*, 2019, **29**, 1905679.
4. K. Sada and P. Barpanda, *Chem. Commun.*, 2020, **56**, 2272-2275.
5. R. Huang, Q. Xue, J. Lin, X. Zhang, J. Zhou, F. Wu, L. Li and R. Chen, *Nano Res.*, 2022, **15**, 3143-3149.
6. Y.-S. Xu, Y.-N. Zhou, Q.-H. Zhang, M.-Y. Qi, S.-J. Guo, J.-M. Luo, Y.-G. Sun, L. Gu, A.-M. Cao and L.-J. Wan, *Chem. Eng. J.*, 2021, **412**, 128735.
7. K. Lei, Z. Zhu, Z. Yin, P. Yan, F. Li and J. Chen, *Chem*, 2019, **5**, 3220-3231.
8. C.-l. Liu, S.-h. Luo, H.-b. Huang, Y.-c. Zhai and Z.-w. Wang, *Chem. Eng. J.*, 2019, **356**, 53-59.
9. J. H. Jo, J. U. Choi, Y. J. Park, Y. H. Jung, D. Ahn, T.-Y. Jeon, H. Kim, J. Kim and S.-T. Myung, *Adv. Energy Mater.*, 2020, **10**, 1903605.
10. Z. Xiao, J. Meng, F. Xia, J. Wu, F. Liu, X. Zhang, L. Xu, X. Lin and L. Mai, *Energy Environ. Sci.*, 2020, **13**, 3129-3137.
11. B. Lin, X. Zhu, L. Fang, X. Liu, S. Li, T. Zhai, L. Xue, Q. Guo, J. Xu and H. Xia, *Adv. Mater.*, 2019, **31**, 1900060.
12. J.-Y. Hwang, J. Kim, T.-Y. Yu, H.-G. Jung, J. Kim, K.-H. Kim and Y.-K. Sun, *J. Mater. Chem. A*, 2019, **7**, 21362-21370.
13. S. Park, S. Park, Y. Park, M. H. Alfaruqi, J.-Y. Hwang and J. Kim, *Energy Environ. Sci.*, 2021, **14**, 5864-5874.
